# Supplementary material for: V-QBA vs. QBA—How Do Video and Live Analysis Compare for Qualitative Behaviour Assessment?
Source: Frontiers journal article supplement (doi:10.3389/fvets.2022.832239), 2022-03-16
Supplement: Data_Sheet_2.pdf [file Data_Sheet_2.pdf]

Date: \_\_/\_\_/\_\_

Name:

Time: \_\_\_\_\_

Group: BROWN GREEN

|                     | MIN | MAX |
|---------------------|-----|-----|
| Active              |     |     |
| Relaxed             |     |     |
| Fearful             |     |     |
| Agitated            |     |     |
| Calm                |     |     |
| Content             |     |     |
| Indifferent         |     |     |
| Frustrated          |     |     |
| Friendly            |     |     |
| Bored               |     |     |
| Playful             |     |     |
| Positively occupied |     |     |
| Lively              |     |     |
| Inquisitive         |     |     |
| Irritable           |     |     |
| Uneasy / calmless   |     |     |
| Sociable            |     |     |
| Apathetic           |     |     |
| Happy               |     |     |
| Distressed          |     |     |
